# Supplementary material
Source: PubMed Central journal article supplement (PMC2705592)
Supplement: 0900072106_ST2_PDF.pdf [file 0900072106_ST2_PDF.pdf]

Table 2: Definition of the kinetic constants for the hybrid Theorell-Chance Ping Pong reaction mechanism

|                                                 |                                                                       |
|-------------------------------------------------|-----------------------------------------------------------------------|
| Maximum velocity of the forward reaction        | $V_{\max}^f = \frac{n_1}{CoAB} = k_3[E]_t$                            |
| Maximum velocity of the reverse reaction        | $V_{\max}^r = \frac{n_2}{CoPQ} = k_{-2}[E]_t$                         |
| Michaelis constant for A (G <sub>t</sub> GDP)   | $K_m^A = \frac{CoB}{CoAB} = \frac{k_3}{k_1}$                          |
| Michaelis constant for B (GTP)                  | $K_m^B = \frac{CoA}{CoAB} = \frac{k_{-2} + k_3}{k_2}$                 |
| Michaelis constant for P (GDP)                  | $K_m^P = \frac{CoQ}{CoPQ} = \frac{k_{-2}}{k_{-1}}$                    |
| Michaelis constant for Q (G <sub>t</sub> GTP)   | $K_m^Q = \frac{CoP}{CoPQ} = \frac{k_{-2} + k_3}{k_{-3}}$              |
| Dissociation constant of B (GTP)                | $K_d^B = \frac{CoQ}{CoBQ} = \frac{k_{-2}}{k_2}$                       |
| Dissociation constant of Q (G <sub>t</sub> GTP) | $K_d^Q = \frac{CoB}{CoBQ} = \frac{k_3}{k_{-3}}$                       |
| Overall equilibrium constant                    | $K_{eq} = \frac{n_1}{n_2} = \frac{k_1 k_2 k_3}{k_{-1} k_{-2} k_{-3}}$ |
